# Supplementary material
Source: Springer Nature journal article supplement (https://www.springermedizin.de/resource/supplementary/12968_2009_949_MOESM4_ESM.pdf/9580022)

(a)

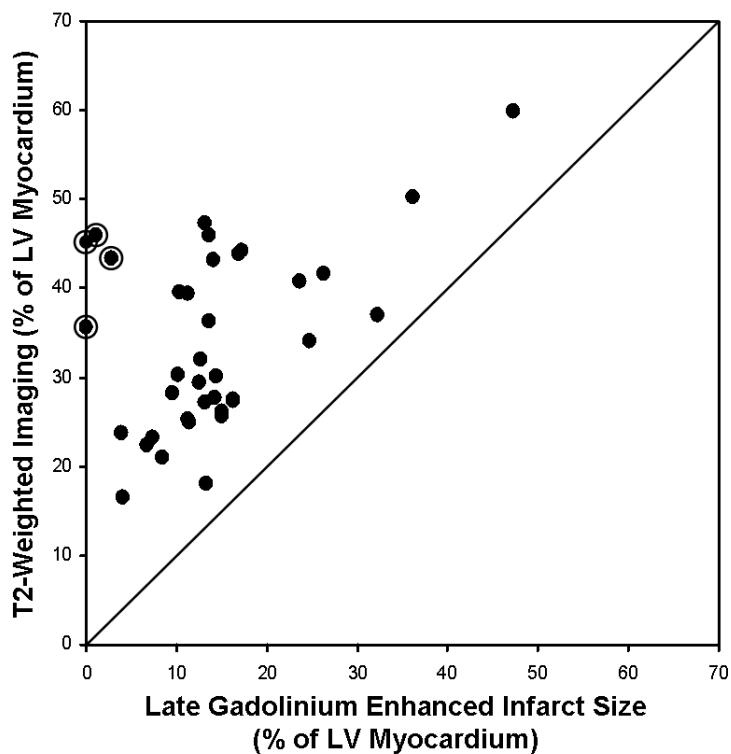

(b)

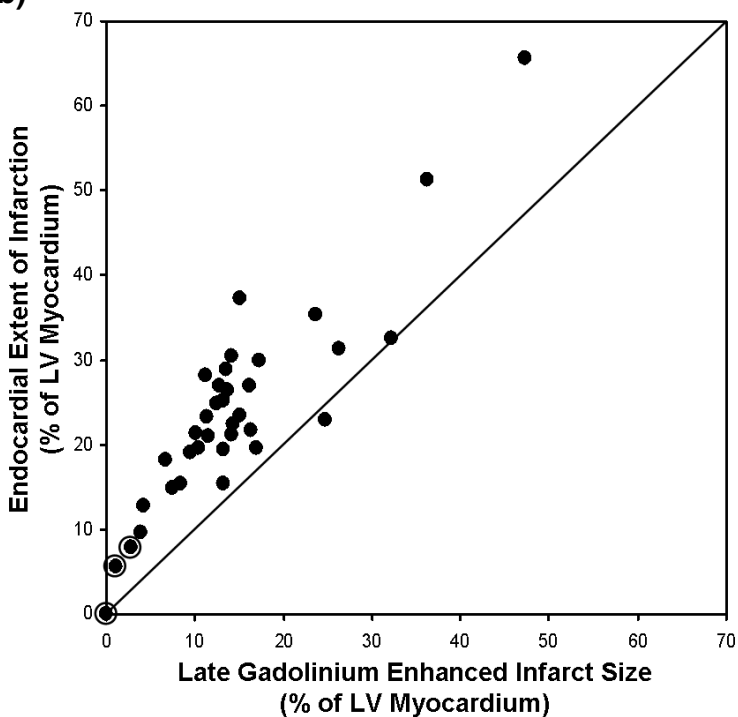

Supplement: MOESM4 [file 9580022]
